# Supplementary material for: Quantification of carbon nanotubes in polymer composites
Source: Royal Society of Chemistry journal article supplement (doi:10.1039/c7ay02654d), 2018-01-01
Supplement: c7ay02654d1.pdf [file c7ay02654d1.pdf]

## Supplementary Information

### Quantification of Carbon Nanotubes in Polymer Composites

T. Nosaka,<sup>a</sup> R. Lankone,<sup>b</sup> Y. Bi,<sup>c</sup> D. H. Fairbrother,<sup>b</sup> P. Westerhoff,<sup>c</sup> P. Herckes<sup>d\*</sup>

<sup>a</sup> School for Engineering of Matter, Transport and Energy, Arizona State University, Tempe, AZ 85287-6106, United States

<sup>b</sup> Department of Chemistry, Johns Hopkins University, Baltimore, MD 21218, United States

<sup>c</sup> School of Sustainable Engineering and the Built Environment, Arizona State University, Box 3005, Tempe, AZ 85278-3005, United States

<sup>d</sup> School of Molecular Sciences, Arizona State University, Tempe, AZ 85287-1604, United States

\*Corresponding author, Pierre.Herckes@asu.edu

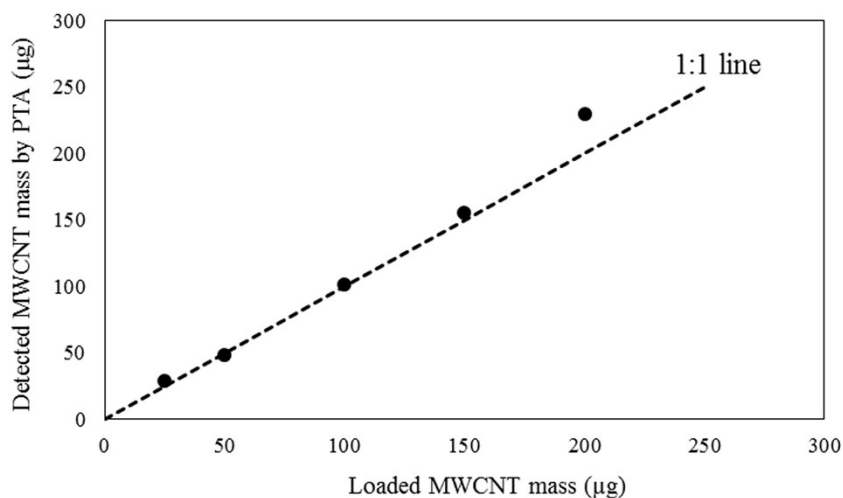

S1. Quantification results by PTA with different mass loadings of neat MWCNTs

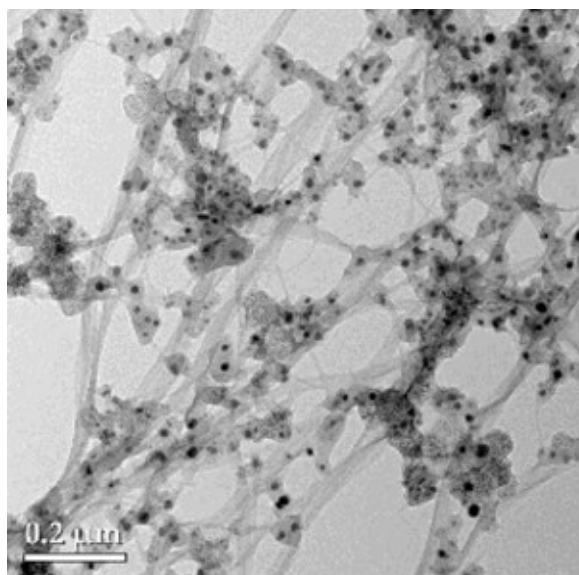

S2. TEM image of SWCNT showing metal catalysts (dark dots).
